# 1 Weakly supervised identification of 2 microscopic human breast cancer-related 3 optical signatures from normal-appearing 4 breast tissue

5 **JINDOU SHI,<sup>1,2</sup> HAOHUA TU,<sup>1,2</sup> JAENA PARK,<sup>2,3</sup> MARINA MARJANOVIC,<sup>2,3,4</sup>**  
6 **ANNA M. HIGHAM,<sup>5</sup> NATASHA N. LUCKEY,<sup>5</sup> KIMBERLY A. CRADOCK,<sup>5</sup>**  
7 **Z. GEORGE LIU,<sup>5</sup> AND STEPHEN A. BOPPART<sup>1,2,3,4,6,\*</sup>**

8 <sup>1</sup>*Department of Electrical and Computer Engineering, University of Illinois at Urbana-Champaign, 306*  
9 *N Wright Street, Urbana, IL 61801, USA*

10 <sup>2</sup>*Beckman Institute for Advanced Science and Technology, University of Illinois at Urbana-Champaign,*  
11 *405 N Mathews Avenue, Urbana, IL 61801, USA*

12 <sup>3</sup>*Department of Bioengineering, University of Illinois at Urbana-Champaign, 1406 W Green Street,*  
13 *Urbana, IL 61801, USA*

14 <sup>4</sup>*Carle Illinois College of Medicine, University of Illinois at Urbana-Champaign, 506 S Mathews*  
15 *Avenue, Urbana, IL 61801, USA*

16 <sup>5</sup>*Carle Foundation Hospital, 611 W Park Street, Urbana, IL 61801, USA*

17 <sup>6</sup>*Cancer Center at Illinois, University of Illinois at Urbana-Champaign, 405 N Mathews Avenue,*  
18 *Urbana, IL 61801, USA*

19 *\*[boppart@illinois.edu](mailto:boppart@illinois.edu)*

20 **Abstract:** With the latest advancements in optical bioimaging, rich structural and functional  
21 information has been generated from biological samples, which calls for capable computational  
22 tools to identify patterns and uncover relationships between optical characteristics and various  
23 biomedical conditions. Constrained by the existing knowledge of the novel signals obtained by  
24 those bioimaging techniques, precise and accurate ground truth annotations can be difficult to  
25 obtain. Here we present a weakly supervised Deep Learning framework for optical signature  
26 discovery based on inexact and incomplete supervision. The framework consists of a Multiple  
27 Instance Learning-based classifier for the identification of regions of interest in coarsely labeled  
28 images, and model interpretation techniques for optical signature discovery. We applied this  
29 framework to investigate human breast cancer-related optical signatures based on virtual  
30 histopathology enabled by simultaneous label-free autofluorescence multiharmonic  
31 microscopy (SLAM), with the goal to explore unconventional cancer-related optical signatures  
32 from normal-appearing breast tissues. The framework has achieved an average area under the  
33 curve (AUC) of 0.975 on the cancer diagnosis task. In addition to well-known cancer  
34 biomarkers, non-obvious cancer-related patterns were revealed by the framework, including  
35 NAD(P)H-rich extracellular vesicles observed in normal-appearing breast cancer tissue, which  
36 facilitate new insights into the tumor microenvironment and field cancerization. This  
37 framework can be further extended to diverse imaging modalities and optical signature  
38 discovery tasks.

39

## 40 1. Introduction

41 Advancements in optical bioimaging have revealed rich structural and functional information  
42 from biological samples based on intrinsic structural, molecular, and metabolic contrasts [1-4].  
43 Without requiring tissue fixation, sectioning, and staining, label-free virtual histopathology  
44 technology fulfilled by multimodal optical bioimaging techniques enables the observation of

45 the unperturbed biochemical microenvironment [5, 6]. Based on the collected morphological  
 46 and molecular information, unconventional cancer-related optical signatures can be revealed,  
 47 which are mainly undetectable using traditional histopathological techniques. However, the  
 48 rich information in multimodal optical bioimages may easily exceed the capabilities of human  
 49 visual inspection. Extracting information and detecting patterns using computational tools  
 50 could therefore enhance perceptions and inspire new scientific discoveries.

51 Deep Learning (DL), which excels at extracting patterns and insights from large volume of  
 52 data, has achieved substantial success in biomedical image analysis [7-9]. However, generating  
 53 accurate and fine-grained manual annotations for DL model training can be time-consuming,  
 54 costly, and sometimes unfeasible [10]. To alleviate the dependency on the strong supervision,  
 55 numerous weakly supervised learning approaches have been proposed to exploit inexact and  
 56 incomplete supervision [11-14]. Among those approaches, Multiple Instance Learning (MIL),  
 57 which leverages inexact supervision, has gained popularity in computational pathology where  
 58 the generation of fine-grained annotations are often costly and time-consuming [15-18].  
 59 Instead, coarse annotations (e.g., labels for the whole slides images) are available more readily.  
 60 It was reported that MIL-based decision support systems have achieved clinical-grade  
 61 performance for cancer diagnosis and identified cancer-related regions when being trained on  
 62 large-size histology datasets without cellular-level annotations [19].

63 In this study, we leverage MIL for human breast cancer-related optical signature  
 64 identification based on label-free virtual histopathology, where only ambiguous whole-image-  
 65 level annotations are available. The virtual histopathology slides were generated using  
 66 simultaneous label-free autofluorescence-multiharmonic (SLAM) microscopy which enables  
 67 simultaneous and efficient acquisition of two- and three-photon-excited autofluorescence (2PF  
 68 and 3PF, respectively) as well as second and third harmonic generation (SHG and THG,  
 69 respectively) with strict spatial and temporal co-registration (Fig. 1) [6, 20]. In addition to  
 70 structural information, SLAM provides the molecular information of a sample in its native state,  
 71 demonstrating its great potential for the exploration of novel molecular biomarkers at early  
 72 stages of cancer, as well as for new fundamental investigations into carcinogenesis [20, 21].

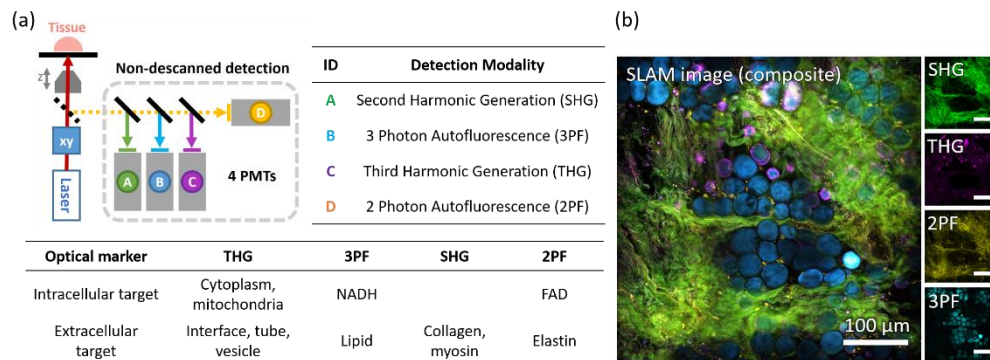

73  
74  
75  
76  
77  
78

**Fig. 1.** Description of the SLAM imaging system and a sample SLAM virtual histopathology slide image. (a) Overview of SLAM imaging system, with the schematic of SLAM microscope (upper left), detection modalities (upper right table), and the targeted intracellular and extracellular optical markers (bottom table). (b) SLAM virtual histopathology slide image collected in the tumor adjacent region of a breast tissue from a cancer human subject.

79  
80  
81  
82  
83  
84

Unlike many DL-based cancer diagnosis applications which focus primarily on tissue regions with well-established cancer-associated morphologies, this study aims to explore unconventional structural and functional optical signatures for which the correlations with breast cancer might not be fully investigated. In addition to primary tumors, the SLAM virtual histopathology slide images (“slides” for brevity) of tumor microenvironment (TME) and

85 peritumoral regions were generated to reveal potential evidence of field cancerization [22, 23].  
86 Studies have shown various interactions between tumor and TME linked with tumor  
87 angiogenesis and peripheral immune tolerance, which may affect the growth and evolution of  
88 cancerous cells [24]. The replacement of large areas of normal cell population by cancer-primed  
89 cell population is often referred to field cancerization that may not involve clinically detectable  
90 morphological changes [25].

91 However, constrained by the current knowledge of the unconventional functional and  
92 structural information generated by SLAM, the annotations for the whole images can be  
93 ambiguous. Namely, tissue images from tumor surrounding regions without conventional  
94 cancer biomarkers can hardly be assigned certain labels (cancer or normal). Additionally, the  
95 cancer-related optical signatures from uncertain regions (e.g., tumor surrounding areas) may  
96 differ from those inside the well-known cancer areas (i.e., primary tumor). This leads to a  
97 unique learning task where DL models need to be trained with inexact and incomplete  
98 supervision at the same time (Fig. S1 in Supplement 1). Therefore, a DL framework that  
99 exploits weak supervision is needed for discovery of cancer-related patterns in both the primary  
100 tumor regions and tumor surrounding regions where potential optical markers for field  
101 cancerization and carcinogenesis may exist. In this study, the cancer-related patterns are  
102 defined as optical characteristics exhibited only in tissues from cancer subjects while being  
103 unobservable in tissues from normal subjects.

104 Here, we propose Mix-and-Match Multiple Instance Learning (MM-MIL) as a weakly  
105 supervised DL framework for the discovery of human breast cancer-related optical signatures.  
106 By modifying the bagging policy in conventional MIL, MM-MIL is designed to learn from  
107 whole-image-level ambiguous annotations. Through iterative selection and learning of  
108 discriminative instances from positive and negative bags, MM-MIL could make whole-slide  
109 level cancer diagnosis, as well as inform cancer-related regions in predicted positive slides. In  
110 addition to well-established cancer biomarkers, MM-MIL revealed non-obvious cancer-related  
111 signatures that appear predominantly in tumor surrounding areas while being unobservable in  
112 breast tissues from normal subjects. Those optical signatures may inspire the discovery of new  
113 cancer markers inside and outside of the tumor microenvironment and promote research on  
114 carcinogenesis, tumor progression, and field cancerization.

115 **Table 1. Description of the SLAM virtual histopathology dataset**

| Dataset    | Total subjects | Cancer subjects | SLAM slides | “Cancer” slides | “Uncertain” slides | “Normal” slides | Size (Mpixels) |
|------------|----------------|-----------------|-------------|-----------------|--------------------|-----------------|----------------|
| Training   | 23             | 17              | 428         | 59              | 237                | 132             | 1,077          |
| Validation | 7              | 5               | 92          | 7               | 61                 | 24              | 203            |
| Test       | 18             | 14              | 204         | 23              | 137                | 44              | 484            |
| Total      | 48             | 36              | 724         | 89              | 435                | 200             | 1,764          |

## 116 2. Materials and methods

### 117 2.1 SLAM virtual histopathology dataset generation

118 SLAM virtual histopathology slides were collected from fresh human breast tissue specimens  
119 using a custom-built benchtop SLAM microscope [20], and under a protocol approved by the  
120 Institutional Review Boards at Carle Foundation Hospital and the University of Illinois at  
121 Urbana-Champaign. Tissue samples from 48 human subjects was used in this study, among  
122 which 36 subjects were diagnosed with ductal carcinoma in situ (DCIS) or invasive breast  
123 cancer (invasive ductal carcinoma, invasive lobular carcinoma, lobular carcinoma in situ,  
124 invasive papillary carcinoma) by board-certified pathologists. Normal tissue samples were  
125 collected from 12 subjects undergoing breast reduction surgery, with no reported history of  
126 cancer. Information on subject demographics can be found in Table S1 in Supplement 1.

127 We generated 724 SLAM slides, where each slide is a mosaic image with a median size of  
128  $1500 \times 1500$  pixels ( $750 \mu\text{m} \times 750 \mu\text{m}$ ). To investigate the potential optical signatures for field  
129 cancerization, both tumor and tumor adjacent regions in cancer tissue samples were imaged.  
130 For images collected in tumor adjacent regions, the distances between the imaging site and the  
131 tumor boundary (annotated by pathologists) ranged from several millimeters to several  
132 centimeters. Slide-level annotations were generated by human experts based on pathological  
133 reports, optical characteristics in SLAM, and the corresponding hematoxylin-eosin (H&E)  
134 histological slides (Fig. S2). Slides that exhibit well-known cancer biomarkers (e.g., tumor  
135 cells, tumor-associated collagen fibers) were annotated as “Cancer”. “Uncertain” labels were  
136 assigned to slides that were from cancer subjects but do not show well-known cancer signatures  
137 (mainly outside the primary tumor). Slides from normal subjects were labeled as “Normal”.  
138 The dataset was randomly split into a training set (about 60% of slides), a validation set (about  
139 10% of slides), and a test set (about 30% of slides) using subject-level partition such that slides  
140 from one subject can only exist in one of these sets. A description of slides in each set is  
141 provided in Table 1.

## 142 2.2 SLAM slide preprocessing

143 Each channel of SLAM slides was normalized using Z-score standardization. In addition, slides  
144 were augmented by flips and rotations: horizontal flip, vertical flip, 90-degree rotation, 180-  
145 degree rotation, 270-degree rotation. Slides were then cropped into tile images (“tiles” for  
146 simplicity), which share the same label as the slides. To investigate cancer-related patterns at  
147 different scales, three tile sizes were used to simulate high-, medium-, and low-magnification  
148 levels. For the high-magnification level, slides were cropped to  $256 \times 256$ -pixel tiles ( $128 \mu\text{m}$   
149  $\times 128 \mu\text{m}$ ) with no overlap between tiles. Medium- and low-magnification levels tiles were  
150 generated by tiling slides into  $512 \times 512$ -pixel images ( $256 \mu\text{m} \times 256 \mu\text{m}$ ), and  $1024 \times 1024$ -  
151 pixel images ( $512 \mu\text{m} \times 512 \mu\text{m}$ ), respectively, and downscaling to  $256 \times 256$ -pixel tiles was  
152 performed using nearest-neighbor interpolation. These tiles cover a larger FOV, but have lower  
153 resolution compared to high-magnification tiles. Overlap ratios of 50% and 80% were used for  
154 medium- and low-magnification levels, respectively. The numbers of tiles at different  
155 magnification levels are reported in Table S2 in Supplement 1.

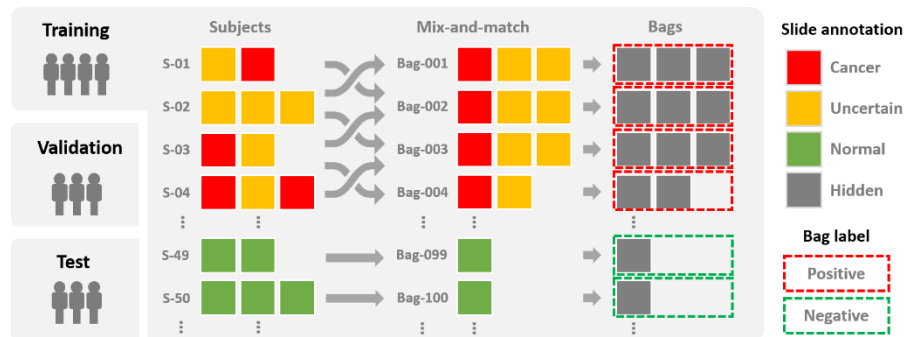

156

157 Fig. 2. The Mix-and-Match bagging policy in MM-MIL. “Cancer” slides and “Uncertain” slides  
158 were randomly grouped together to form positive bags, whereas “Normal” slides were treated as  
159 negative bags. During model training, all slide-level labels were hidden, and only bag-level  
160 labels (“Positive” or “Negative”) were used.

## 161 2.3 MM-MIL framework

162 To identify and localize cancer-related patterns in coarsely labeled SLAM slides, the cancer  
163 signature discovery task was formulated a MIL problem, where SLAM tiles were treated as  
164 MIL instances. To enable the MIL model to extract cancer-related patterns from both “Cancer”  
165 and “Uncertain” slides, a custom-designed bagging policy (i.e., Mix-and-Match) was  
166 developed to ensure the explicitness of bag-level labels (Fig. 2). Instead of treating each SLAM

167 slide as a MIL bag, slides were mixed and grouped together to form bags in MIL. For each set  
 168 (i.e., training, validation, or test set), a positive bag was defined as a group of “Cancer” slides  
 169 and “Uncertain” slides. Since at least one tile in the positive bag has cancer signatures, explicit  
 170 labels (“Positive”) could be assigned to the bag based on the standard assumption of MIL [26].  
 171 Considering that “Normal” slides came from normal subjects with no history of cancer, each  
 172 of them can form an individual bag with a certain “Negative” label. To maximize the number  
 173 of bags, every positive bag contained only one “Cancer” slide. While “Uncertain” slides were  
 174 randomly distributed to all positive bags. Notably, only bag-level labels were used for model  
 175 training, while slide-level labels were hidden to encourage models to look for cancer-related  
 176 optical signatures in both “Cancer” and “Uncertain” slides.

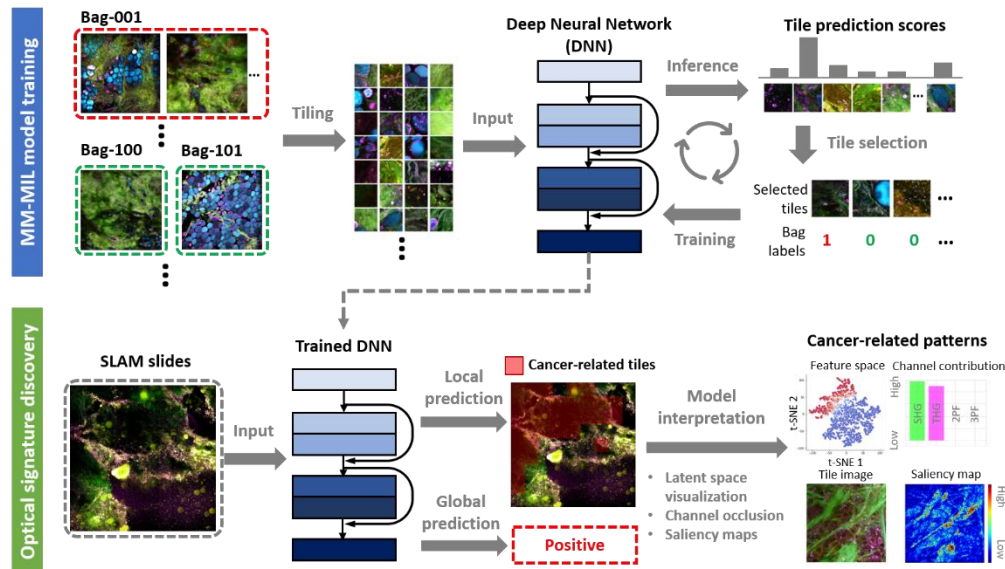

177  
 178  
 179  
 180  
 181  
 182  
 Fig. 3. Description of the MM-MIL framework. During model training, a DNN-based tile-level  
 classifier is optimized through iterative selection and learning of discriminative tiles from Mix-  
 and-Match bags. Once the classifier is trained, local and global cancer predictions can be  
 generated. Model interpretation methods are utilized to inform cancer-related patterns learned  
 by the model.

183 Based on the MIL bags generated by the Mix-and-Match bagging policy, DL-based models  
 184 were trained to make cancer diagnosis on the bag level (i.e., global prediction) as well as on the  
 185 instance level (i.e., local prediction). This was achieved by training an instance-level classifier  
 186 and aggregating the instance-level predictions to generate bag-level classification results  
 187 (Fig. 3). Inspired by [19, 27], the instance-level classifier ( $f_{ins}$ ) was trained in an iterative  
 188 manner using the EM algorithm. Each training epoch started with an inference step (the E-step  
 189 in EM), where the model generated prediction scores (i.e., cancer probability) for all the tiles  
 190 in every training bag. The training sample pool  $T_{train}$  was then constructed by selecting the top  
 191  $K$  instances with highest prediction scores in each bag:

$$T_{train} = \{x \in B_i : |\{x' \in B_i : f_{ins}(x) < f_{ins}(x')\}| < K, i = 1, 2, \dots, N\}, \quad (1)$$

192 where  $x$  represents an instance,  $B_i$  is the  $i$ -th bag among the total  $N$  bags, and  $K$  is a user-  
 193 defined parameter. The top  $K$  instances shared the labels with their bags. The instance classifier  
 194 was then trained on the training sample pool  $T_{train}$  for one epoch (i.e., the M-step in EM). The  
 195 training procedure of the instance-level classifier is further illustrated in Supplement 1. In this  
 196 study, we use the ResNet34 as the backbone of the instance-level classifier [28]. The model  
 197 was initialized using weights pretrained on ImageNet except for the first convolution layer and

198 the last fully connected layer, of which the input and output dimensions were customized for  
199 the task, were randomly initialized.

200 Bag-level predictions were obtained by aggregating instance-level prediction scores.  
201 Constrained by the size of the dataset used in this study, we chose a nonparametric method  $f_{bag}$   
202 (i.e., max-pooling operation) for bag-level aggregation. That is, if at least one instance in a  
203 particular bag  $B_i$  is positive (probability  $> 0.5$ ), the whole bag is predicted as positive:

$$f_{bag}(B_i) = \begin{cases} 1, & \text{if } \exists x_{ij} \in B_i: f_{ins}(x_{ij}) > 0.5; \\ 0, & \text{otherwise.} \end{cases} \quad (2)$$

204 Compared to trainable bag aggregation methods [29, 30], the max-pooling operation is more  
205 sensitive to spurious positive instances, thus imposes higher requirements on the reliability of  
206 instance-level classifiers.

### 207 2.3 Training strategy and loss function

208 Each MM-MIL instance classifier was trained for at least 50 epochs and at most 200 epochs.  
209 Model performance was evaluated on the validation set, where the classification accuracy was  
210 recorded. Early stopping would be triggered when the validation accuracy did not increase for  
211 30 consecutive epochs. The model with highest validation accuracy was saved for final  
212 performance evaluation on the test set. The objective function of the instance-level classifier is  
213 the cross-entropy loss:

$$\mathcal{L}(y_k, \hat{y}_k) = -w_1 [y_k \log(\hat{y}_k)] - w_0 [(1 - y_k) \log(\hat{y}_k)], \quad (3)$$

214 where  $y_k, \hat{y}_k$  are the bag-level ground truth and prediction score respectively, and  $w_0, w_1$  are  
215 negative and positive class weights, which are set to deal with the unbalanced class frequency  
216 within the training sample pool. The optimization of model parameters was achieved by  
217 stochastic gradient descent using the Adam optimizer, with a learning rate of  $1.5 \times 10^{-4}$ , and  
218 a weight decay of  $1 \times 10^{-5}$ . A detailed description of hyperparameters used in the experiments  
219 can be found in Table S3 in Supplement 1.

### 220 2.3 Model evaluation

221 The global prediction generated by MM-MIL were evaluated as a binary classification task.  
222 The average performance of five MM-MIL models trained with the same configuration was  
223 reported. For each magnification level (i.e., high, medium, and low), the receiver operating  
224 characteristic (ROC) curves and the associated area under the curve (AUC) were calculated.  
225 Due to the absence of certain ground truth labels for “Uncertain” slides, two approaches were  
226 adopted to evaluate the global prediction performance. For the first approach, MM-MIL models  
227 were evaluated on the Mix-and-Match bags in the test set, each of which has a certain “Positive”  
228 or “Negative” label. In the second approach, the model performance is assessed on the test  
229 slides with certain labels (i.e., “Cancer” and “Normal”).

230 To quantitatively evaluate the local (tile-level) predictions, known tumor areas in “Cancer”  
231 slides were annotated by human experts based on the appearance of known cancer signatures.  
232 Considering that the areas outside human-annotated tumor regions may also exhibit non-  
233 obvious cancer-related patterns, commonly used evaluation metrics (e.g., Intersection over  
234 Union (IoU)) may not be suitable in this study. Instead, the coverage ratio  $R_{coverage}$  was used  
235 to measure the coverage of the model’s cancer predictions on known tumor regions. The known  
236 tumor regions in “Cancer” slides in the test set were annotated based on the well-known cancer  
237 signatures. The coverage ratio was calculated by  $R_{coverage} = m_{pp}/m_{TP}$ , where  $m_{TP}$  is the  
238 number of tumor tiles, of which at least 50% of the tile area is annotated as tumor region,  
239 whereas  $m_{TP}$  is the number of predicted positive tiles among the  $m_{TP}$  tumor tiles. In addition,  
240 the positive tile ratios in each group of slides (i.e., “Cancer”, “Uncertain”, and “Normal”) were

241 calculated by  $R_{positive} = m_{positive}/m_{total}$ , where the total number of tiles and the number of  
242 positive tiles in a particular group are denoted as  $m_{total}$ , and  $m_{positive}$  respectively.

## 243 *2.4 Model interpretation*

244 To gain insights into model predictions, three model interpretation methods were leveraged for  
245 the discovery of cancer-related optical signatures. Firstly, the latent feature space of the  
246 ResNet34 model was visualized in two dimensions using t-distributed stochastic neighbor  
247 embedding (t-SNE) [31]. Tiles (converted to RGB images) corresponding to the points in the  
248 t-SNE plot were sampled and visualized for model introspection. Secondly, SLAM channels of  
249 predicted positive tiles was occluded to investigate the importance of each channel for the  
250 cancer classification task. The decrease in prediction score can be seen as an indicator of  
251 channel importance regarding to the prediction task. Lastly, saliency map techniques,  
252 Integrated Gradients (IG) [32] and SmoothGrad (SG) [33], were utilized to inform the salient  
253 structures on the pixel-level. The implementation details of model interpretation were reported  
254 in Supplement 1.

## 255 *2.5 Implementation details*

256 All data processing and model development were conducted on a workstation computer,  
257 equipped with an Intel Xeon W-2195 central processing unit (CPU), four Nvidia RTX 8000  
258 graphics processing units (GPUs), and 256 gigabytes of memory. The workstation operates on  
259 the Ubuntu system (version 18.04). During the model optimization, each batch (i.e., 600 tiles  
260 per batch) required 0.365 s for the inference step, and 0.694 s for the training step with four  
261 GPUs. At the prediction time, MM-MIL generates diagnoses at an average speed of 23.39  
262 slides/s in high-magnification mode, and 26.17 slides/s in low-magnification mode on  
263 2000×2000-pixel SLAM slides. The source code for MM-MIL is available in a public  
264 repository on GitHub, <https://github.com/Biophotonics-COMI/MM-MIL>.

## 265 **3. Results**

### 266 *3.1 Global prediction evaluation*

267 The global prediction evaluation results are shown in Fig. 4(a)(b) and Table 2. MM-MIL  
268 achieved average AUCs of 0.975, 0.971, and 0.969 when evaluated on the Mix-and-Match bags  
269 under high-, medium-, and low-magnification settings respectively [Fig. 4(a)]. In addition,  
270 when evaluated on the test slides with certain labels (“Cancer” or “Normal”), an average AUC  
271 of 0.939 was achieved for the high-magnification level. While for medium- and low-  
272 magnification settings, average AUCs of 0.810 and 0.816 were achieved respectively  
273 [Fig. 4(b)]. The differences in AUCs between bag- and slide-level predictions indicate that the  
274 “Uncertain” slides in positive bags have considerable contribution to cancer prediction. For  
275 both bag-level and slide-level global prediction tasks, we observed that MM-MIL models  
276 trained on the high magnification level achieved the best performance.

277 In addition, experiments were conducted to compare the performance of model trained with  
278 the Mix-and-Match bagging policy and conventional bagging strategies (i.e., slide-level and  
279 subject-level). For the slide-level bagging policy, each slide was treated as a MIL bag. Slides  
280 from cancer subjects were labeled as positive. While for subject-level bagging policy, slides  
281 from individual subjects were grouped into a MIL bag with labels being determined by the  
282 subject information (positive for cancer subjects, and negative for normal subjects). Due to the  
283 fact that SLAM slides from cancer subjects might come from tumor surrounding regions, where  
284 evidence of cancer may not present, the ground truth labels for slide-level and subject-level  
285 bags can be unreliable. When being tested on the same held-out test set with certain slide labels,  
286 the MIL models achieved an average AUC of 0.939, 0.808, and 0.781 with Mix-and-Match,  
287 slide-level, and subject-level bagging strategies respectively (Fig. S3). In addition, the large

288 variance in AUCs was observed for slide-level and subject-level bagging strategies, with the  
 289 standard derivation to be 0.020, 0.211, and 0.257 for the three bagging strategies, respectively.

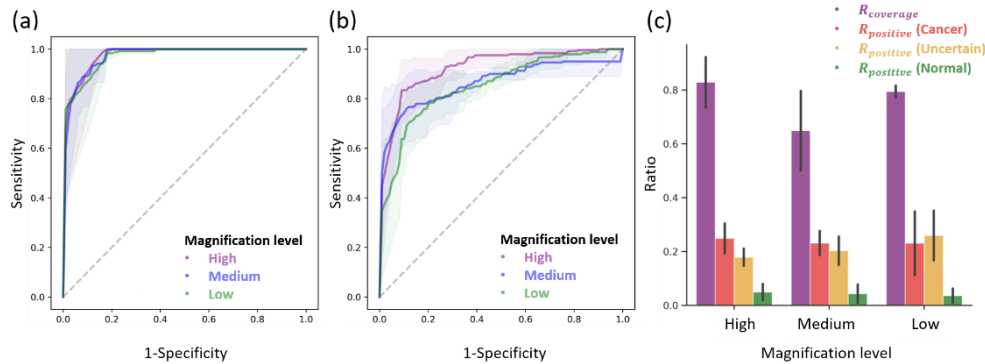

290

291

292

293

294

295

**Fig. 4.** Global and local prediction evaluation results. ROC curves for MM-MIL models evaluated on the Mix-and-Match bags (a) and the slides with certain labels (b). The solid lines indicate the mean curve over five models trained under the same configuration, and the shaded regions indicate  $\pm$  standard deviation. (c) Bar chart of local prediction evaluation metrics. The error bars indicate  $\pm$  standard deviation.

296

297

**Table 2. Global and local evaluation metrics (mean  $\pm$  standard deviation) for MM-MIL models trained on high-, medium-, and low-magnification levels**

| Magnification level | Global prediction evaluation      |                                   | Local prediction evaluation       |                         |                            |                         |
|---------------------|-----------------------------------|-----------------------------------|-----------------------------------|-------------------------|----------------------------|-------------------------|
|                     | Bag-level AUC                     | Slide-level AUC                   | $R_{coverage}$                    | $R_{positive}$ (cancer) | $R_{positive}$ (uncertain) | $R_{positive}$ (normal) |
| High                | <b>0.975<math>\pm</math>0.033</b> | <b>0.924<math>\pm</math>0.040</b> | <b>0.823<math>\pm</math>0.094</b> | 0.249 $\pm$ 0.062       | 0.178 $\pm$ 0.036          | 0.049 $\pm$ 0.033       |
| Medium              | 0.971 $\pm$ 0.025                 | 0.862 $\pm$ 0.046                 | 0.629 $\pm$ 0.148                 | 0.231 $\pm$ 0.050       | 0.203 $\pm$ 0.059          | 0.043 $\pm$ 0.039       |
| Low                 | 0.969 $\pm$ 0.041                 | 0.850 $\pm$ 0.044                 | 0.794 $\pm$ 0.022                 | 0.231 $\pm$ 0.132       | 0.259 $\pm$ 0.103          | 0.036 $\pm$ 0.030       |

298

### 3.2 Local prediction evaluation

299

300

301

302

303

304

305

306

307

308

309

310

311

312

313

To evaluate the local (tile-level) predictions, cancer-related regions predicted by MM-MIL were compared with the known tumor areas with well-known cancer signatures. The resulting  $R_{coverage}$  ratio was reported in Fig. 4(c) and Table 2. For models trained on the high-magnification mode, 82.3% of annotated-positive tiles were predicted as positive on average, while the models achieved average  $R_{coverage}$  ratios of 62.9% and 79.4% for medium- and low-magnification modes respectively.  $R_{positive}$  was calculated for “Cancer”, “Uncertain”, and “Normal” slides individually. For “Normal” slides from healthy subjects, whose tissue samples were not expected to show evidence of cancer, the average  $R_{positive}$  ratios are 4.9%, 4.3%, and 3.6% under the high-, medium-, and low-magnification settings, respectively. Interestingly, a good number of tile images in “Uncertain” slides were predicted as positive, with average  $R_{positive}$  ratios to be 17.8%, 20.3%, and 25.9% for the corresponding magnification levels, indicating that “Uncertain” slides may show evidence of cancer according to the MM-MIL models. However, from the perspective of human experts, the positive tiles in “Uncertain” slides do not exhibit well-known cancer-associated patterns, thus requiring further analysis and interpretation.

314

315

316

317

Overall, MM-MIL models trained on the high-magnification level achieved the highest AUC scores for the global prediction tasks, as well as highest  $R_{coverage}$  for the local prediction tasks. In the following sections, we will focus on the high magnification level which has the most detailed local information about the tissue sample.



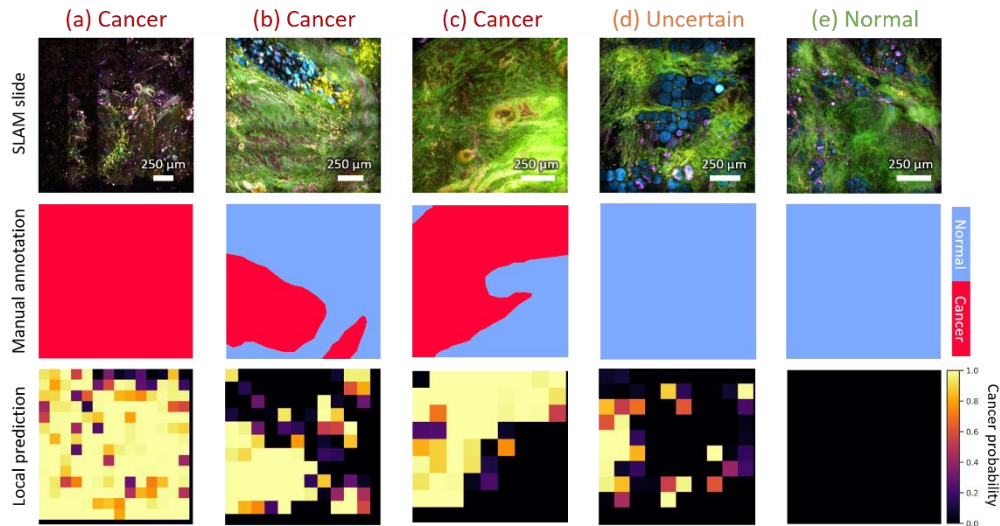

318

319

320

321

322

323

**Fig. 5.** Cancer localization predictions of SLAM slides from “Cancer” group (a)-(c), “Uncertain” group (d), and “Normal” group (e) produced by a MM-MIL model trained on the high-magnification setting. The cancer regions were annotated by human experts based on well-known cancer biomarkers (second row). The cancer probabilities of each tile in the slide are visualized as heatmaps in the third row.

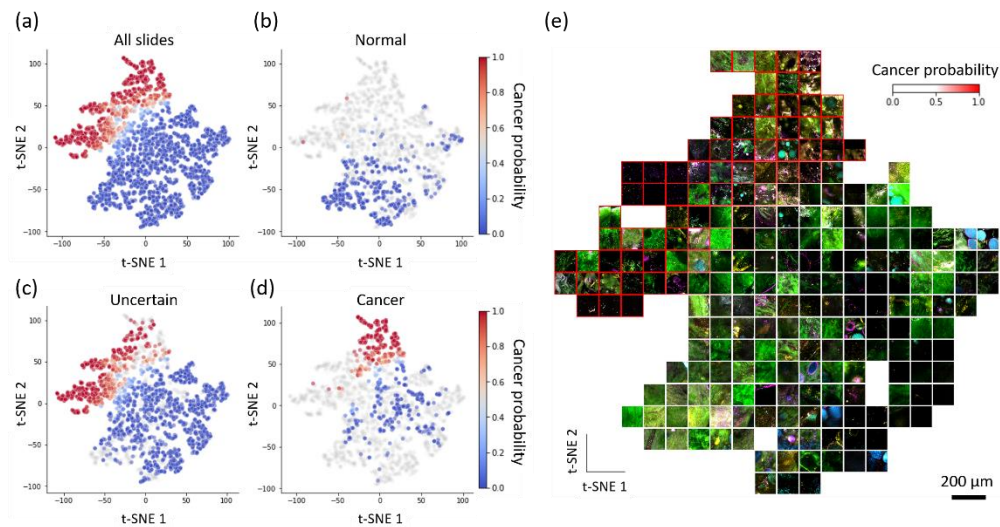

324

325

326

327

328

329

330

**Fig. 6.** t-SNE visualization of the latent feature space of a trained MM-MIL model. (a) t-SNE plot of tiles from all slides in the test set. Each dot represents a SLAM tile image. Dots are colored based on the cancer probabilities predicted by the MM-MIL model. Tiles from “Normal”, “Uncertain”, and “Cancer” slides are highlighted in (b-d) separately. (e) SLAM tiles (composite images) corresponding to the dots in the t-SNE plot were sampled and visualized in the same locations.

331

### 3.3 Visualization of latent feature space for model introspection

332

333

334

335

336

To gain insight into model predictions, the latent feature representations of tiles were visualized in two dimensions using t-SNE. Tiles with similar feature representations according to the model were grouped close to each other. Fig. 6 shows the t-SNE visualization of tiles from all test slides, and the t-SNE visualization of predicted positive tiles is shown in Fig. 7. As shown in Fig. 6(b), the majority of tiles from “Normal” slides have low cancer probability according

337 to MM-MIL, whereas a considerable number of tiles from “Uncertain” slides were predicted  
338 positive (cancer probability  $> 0.5$ ), as shown in Fig. 6(c). Noticeably, a large proportion (around  
339 70%) of positive tiles from “Uncertain” slides formed separate clusters with positive tiles from  
340 “Cancer” slides in the latent feature space, indicating that “Uncertain” slides may exhibit  
341 cancer-related patterns that were undetected in “Cancer” slides [Fig. 6(c)(d)]. Such cancer-  
342 related patterns were not observed in “Normal” slides [Fig. 6(b)], which implies that, based on  
343 SLAM microscopy, unique cancer-related patterns may be revealed from tumor-adjacent and  
344 peri-tumoral regions.

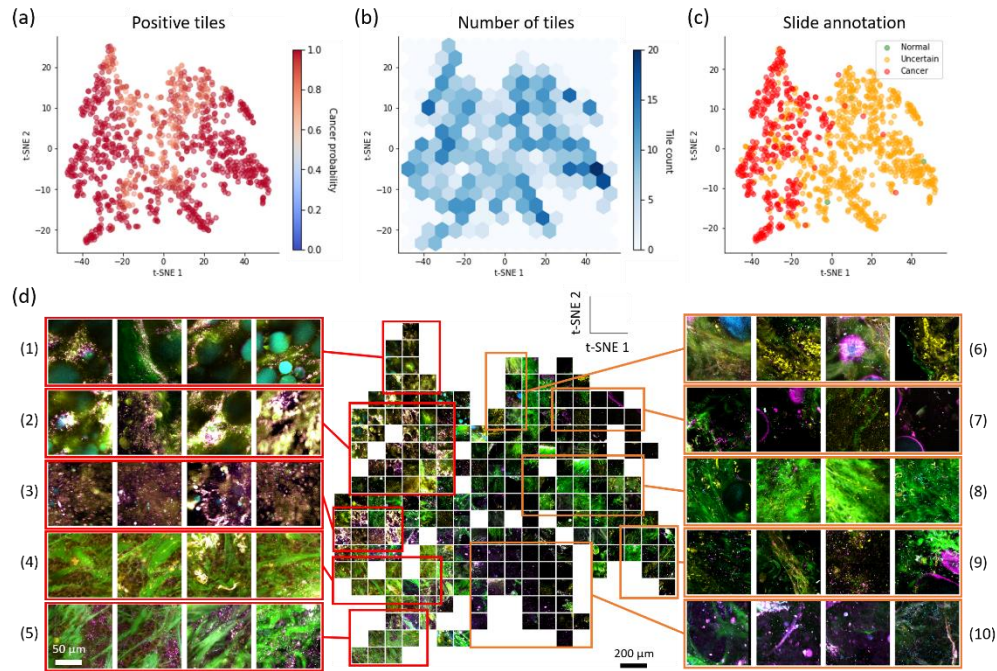

345  
346  
347  
348  
349  
350  
351  
352  
353  
354

**Fig. 7.** Visualization of the latent feature representations of predicted positive tiles (cancer probability  $> 0.5$ ). (a) t-SNE plot of positive tiles predicted by MM-MIL. (b) A hexagonal heatmap showing the number of tiles in each region of the t-SNE plot. (c) Cancer-related patterns from “Cancer” and “Uncertain” SLAM slides exhibit both similarities (left part, with tiles from both “Cancer” and “Uncertain” slides) and differences (right part, with mainly tiles from “Uncertain” slides). (d) Positive SLAM tiles corresponding to the dots in the t-SNE plot were sampled and visualized in the same locations. Positive tiles in the red bounding boxes (1)-(5) came from “Cancer” and “Uncertain” slides, while positive tiles inside orange bounding boxes (6)-(10) came predominantly from “Uncertain” slides.

355 The corresponding tile images in the t-SNE plot are visualized in Fig. 6(e), with each  
356 channel of the images (i.e., SHG, THG, 2PF, 3PF) to be visualized separately in Fig. S4 in  
357 Supplement 1. It can be observed that the normal patterns presented in negative tiles (cancer  
358 probability  $\leq 0.5$ ) include collagen (green, from second harmonic generation - SHG) and  
359 adipocytes (cyan, from three-photon fluorescence - 3PF). While in positive tiles, significant  
360 optical heterogeneity is observed, implicating the existence of various cancer-related patterns.  
361 This is further demonstrated in Fig. 7, where the latent feature space of positive tiles was  
362 visualized. The apparent discrepancy of cancer-related patterns from “Cancer” and “Uncertain”  
363 slides can also be observed in Fig. 7(c), where tiles from both “Cancer” and “Uncertain”  
364 appear on the left half of the t-SNE plot, while positive tiles on the right mainly are from  
365 “Uncertain” slides. As shown in Fig. 7(d), predicted positive tiles show the diversity of optical  
366 characteristics of cancer-related tiles revealed by MM-MIL. From these observations, we can  
367 infer that MM-MIL is able to identify cancer-related patterns from both “Uncertain” and

368 “Cancer” slides to differentiate positive bags from the negative ones during the training process.  
 369 This property makes MM-MIL useful for optical signature discovery in uncertain areas, where  
 370 cancer-related patterns may not exist in “Cancer” slides.

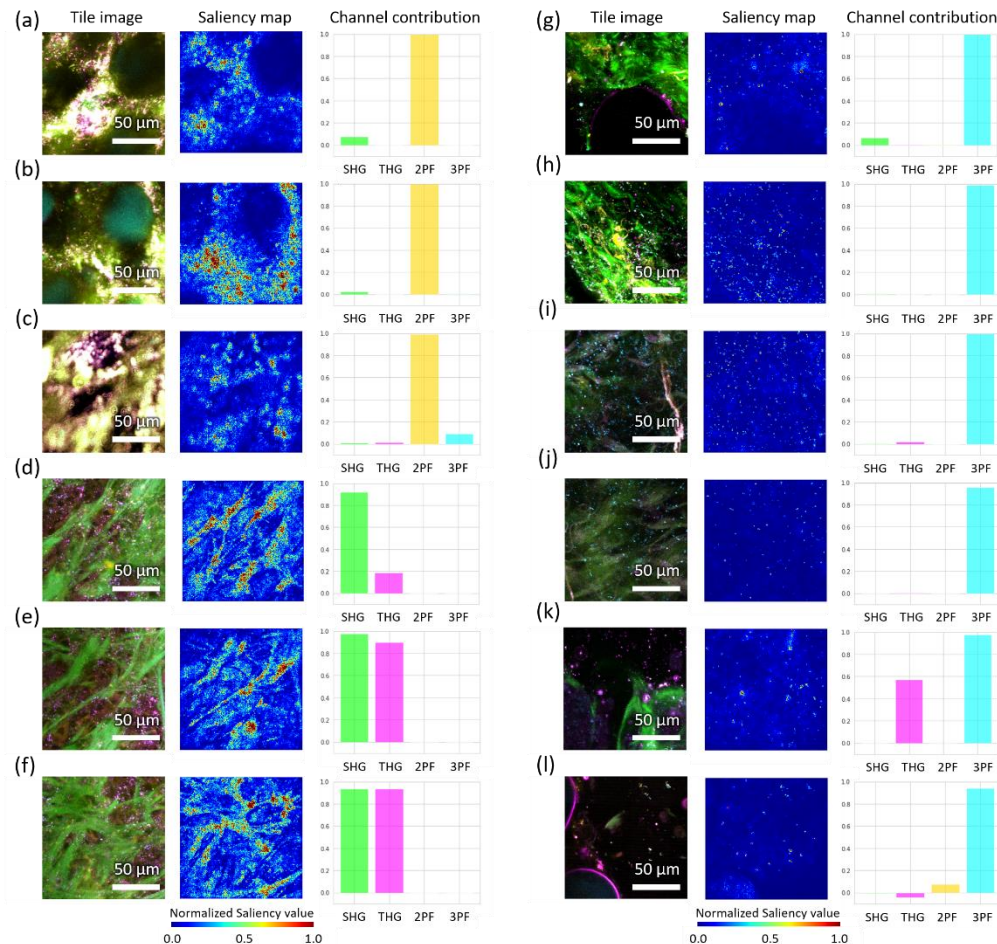

371

372

373

374

375

376

**Fig. 8.** Cancer-related patterns informed by saliency maps and channel occlusion measurements of predicted positive tiles. The values in the channel occlusion bar charts represent the decrease in predicted cancer probability when a particular SLAM channel is occluded. Representative cancer tiles from “Cancer” slides are shown in (a-f). Representative positive tiles from “Uncertain” slides are shown in (g-l).

377

### 3.4 Channel-wise pixel-level model interpretation

378

379

380

381

382

383

384

385

386

387

388

Considering that the four detection modalities of SLAM provide distinct optical contrasts of tissue samples, learning the contribution of each SLAM channel may inspire the discovery of the cancer-related optical signatures. Here, an occlusion-based method was utilized to inform the importance of each SLAM channel for cancer prediction. In addition, saliency maps were generated, which inform the prominent structures on the pixel level. It was observed that the highly informative channels (the ones inducing significant change in prediction score after occlusion) differ among positive tiles (Fig. 8), which indicates that the importance of each channel for cancer prediction may vary within positive tiles. Among them, 2PF, THG, and SHG channels have high contribution for cancer tile predictions in “Cancer” slides [Fig. 8(a-f)]. While for the positive tiles in “Uncertain” slides, the 3PF channel has predominant contribution to the predictions [Fig. 8(g-l)]. According to the saliency maps, the cyan point-like objects in

389 the 3PF channel were determined as a highly informative feature for cancer prediction. Those  
390 cancer-related patterns were further discussed in the following sections.

### 391 *3.5 Cancer-related patterns informed by MM-MIL*

392 Based on the forementioned localization predictions and model interpretation methods, several  
393 cancer-related patterns were revealed by MM-MIL, including well-known cancer biomarkers  
394 and non-obvious cancer-related patterns.

#### 395 *3.5.1 Well-known cancer biomarkers*

396 Dense clusters of tumor cells are visible in the positive tiles from “Cancer” slides [Fig. 7(d),  
397 rows (4) and (5)]. Those breast cancer tumor cells are reported to have high THG signal  
398 intensity (magenta colored) in SLAM images [34], which match with our findings that the THG  
399 channel has a significant contribution to cancer prediction as shown in Fig. 8(d-f).

400 Additionally, collagen fibers (visible in SHG channel) are highlighted in positive tiles  
401 [Fig. 8(d-f)]. In breast cancer, stromal collagen fibers participate in the migration of metastatic  
402 tumor cells which may promote tumorigenesis [35]. Based on the morphology and their  
403 interactions with tumor cells, collagen fiber patterns in breast cancer can be categorized into  
404 different types of tumor-associated collagen signatures (TACS) [36, 37]. Using the saliency  
405 maps and channel occlusion results, collagen fibers that co-occur with tumor cells were  
406 determined as prominent structures for cancer diagnosis by MM-MIL [Fig. 8(d-f)]. This  
407 specific pattern matches with the characteristics of TACS-6, which is defined by the disordered  
408 alignment of collagen fibers that enables multidirectional tumor cell migration. According to  
409 pathological reports, such collagen fiber patterns appeared in SLAM images from subjects who  
410 were diagnosed with invasive ductal carcinoma. This aligns the previous observation that  
411 TACS-6 appears at the invasive stage of tumor development [37]. Constrained by the FOV of  
412 tiles at all magnification levels (i.e.,  $128\ \mu\text{m} \times 128\ \mu\text{m}$  for high,  $256\ \mu\text{m} \times 256\ \mu\text{m}$  for medium,  
413 and  $512\ \mu\text{m} \times 512\ \mu\text{m}$  for low-magnification level), other large-scale TACS signatures (mainly  
414 defined on the millimeter scale) could not be observed in MM-MIL predictions.

#### 415 *3.5.2 Non-obvious cancer-related patterns*

416 The non-obvious cancer-related patterns, which mainly come from “Uncertain” slides, are  
417 visualized in [Fig. 7(d), rows (6-10)]. Among those patterns, we found that the cyan point-like  
418 objects in the 3PF channel were repeatedly highlighted by saliency maps [Fig. 8(g-l)].  
419 Occluding the 3PF channel leads to a significant drop in the prediction score. Such pattern can  
420 also be observed as clusters among positive tiles in the latent feature space (Fig. S4).

421 Previous studies showed that these cyan dots are NAD(P)H-rich extracellular vesicles  
422 (EVs), which appear as diffraction-limited punctuated pixels in the SLAM 3PF  
423 channel [38, 39]. EVs play an important role in intercellular communication between cancer  
424 cells and the tumor microenvironment [38]. They contribute to cancer growth and metastasis  
425 with multiple functionalities, including the suppression of immune response, the recruitment of  
426 stromal cells, and the determination of organotrophic metastasis [40, 41]. The high  
427 concentration of NAD(P)H has also been reported in cancer cells, which is considered to be  
428 linked to the antioxidant defense mechanism [42] and Warburg effect [43]. In addition, EVs  
429 from breast cancer cells are reported to have significantly higher NAD(P)H concentration  
430 compared with EVs from nontumorigenic cells [39]. It is also reported that EVs outside the  
431 visible tumor area (as far as 5 cm away from the tumor boundary) show even higher NAD(P)H  
432 concentration compared to EVs within the tumor, demonstrating the far-reaching impact of EVs  
433 in carcinogenesis [44, 45]. Those reported results support the findings by MM-MIL that  
434 NAD(P)H-rich EVs (or cyan dots in the 3PF channel) are associated with breast cancer, and  
435 that such pattern can be more easily observed in peri-tumoral regions (mainly represented by  
436 “Uncertain” slides) than tumor areas (shown in the “Cancer” slides).

437 In addition to forementioned patterns, we also observed some suspicious cancer-related  
438 patterns that are difficult to attribute to known biological processes or mechanisms, including  
439 the FAD-rich punctuated patterns surrounding adipocytes [Fig. 8(a-c)]. Further studies are  
440 needed to verify the correlation between these unveiled optical signatures and human breast  
441 cancer.

#### 442 **4. Discussion**

443 In this study, we developed a weakly-supervised deep learning framework (MM-MIL) for the  
444 discovery of human breast cancer-related optical signatures based on label-free virtual  
445 histopathology (SLAM microscopy) which contains rich structural and functional information  
446 in tissue samples. The task of this optical signature discovery has three main characteristics:  
447 (1) inexact supervision, (2) incomplete supervision, and (3) positive instances in labeled and  
448 unlabeled data that may come from separate inherent distributions. MM-MIL combines the  
449 inexact and incomplete supervision into one MIL task via the Mix-and-Match bagging policy,  
450 which ensures the explicitness of bag-level labels. The established framework detected cancer-  
451 related patterns in both primary tumor areas and surrounding peri-tumoral regions. Based on  
452 model interpretation, a variety of human breast cancer-related patterns were revealed from  
453 SLAM virtual histopathology slides, including well-known cancer signatures as well as non-  
454 obvious patterns. Among them, the presence of NAD(P)H-rich EVs support our previous  
455 suggestion that breast-cancer-associated EVs could have extensive impact on carcinogenesis,  
456 which would be associated with field cancerization [39, 46]. The optical signatures found by  
457 MM-MIL inspire new hypotheses for cancer biomarker discovery and translational clinical  
458 applications, and merit further investigation.

459 MM-MIL is capable of learning cancer-related patterns from both labeled and unlabeled  
460 data. Instead of taking shortcuts by making positive predictions only on “Cancer” slides, MM-  
461 MIL tracked cancer-related patterns in both “Cancer” and “Uncertain” slides. This can be  
462 explained by the fact that during the early stage of the training process, the selection of  
463 discriminative tiles for model weights updates is mainly stochastic. Since slide-level labels are  
464 hidden during training, it is unlikely for the model to pick tiles only from “Cancer” slides under  
465 the circumstances that “Uncertain” slides also contain cancer-related patterns. In general, the  
466 goal of MM-MIL is to reveal patterns that are not observable from “Normal” slides, regardless  
467 of the slide-level labels (i.e., “Cancer” or “Uncertain” slides).

468 Given the uniqueness of the multi-modal images (i.e., each channel of SLAM provides  
469 distinct structural and functional information about the tissue), knowing the contribution of  
470 each channel and the salient structures is beneficial for the understanding of model behavior.  
471 Thus, two channel-wise model interpretation methods (i.e., channel occlusion and saliency  
472 maps) were leveraged. Using these techniques, several well-known cancer biomarkers as well  
473 as non-obvious cancer-related patterns were revealed in both the primary tumor areas and the  
474 surrounding peri-tumoral regions, which align with the before-mentioned assumption of  
475 potentially separate distributions of positive instances.

476 The MM-MIL framework has some limitations. The cancer-related patterns learned by  
477 MM-MIL are constrained by the size of the FOV of the tile images. In this study, we focus on  
478 patterns at the scale of 128  $\mu\text{m}$ , 256  $\mu\text{m}$ , and 512  $\mu\text{m}$ . To learn larger-scale patterns (e.g., large-  
479 scale tumor-associated collagen signatures), larger tile FOVs would be recommended. Further  
480 improvements can be made to enable optical signatures discovery for multi-class scenarios  
481 (e.g., cancer prognosis) with enhanced capability in extracting correlations of patterns across  
482 regions and scales. In addition, further validation of our framework is needed to verify its  
483 generalizability on data from different microscopy systems.

#### 484 **5. Conclusion**

485 The proposed weakly-supervised deep learning framework offers a practical solution to gain  
486 insights into multiplexed optical bioimages when explicit annotations are unavailable. With the

487 advancements in optical imaging techniques, many crucial biological questions can be  
488 answered based on the rich structural and functional information revealed from samples. It is  
489 widely believed that DL is proficient at extracting knowledge from large volume of data.  
490 Nevertheless, strong supervision is often difficult to obtain for optical signature discovery tasks.  
491 This study demonstrates the capability of the proposed framework in recognizing patterns and  
492 extracting correlations between optical features with human breast cancer based on inexact and  
493 incomplete supervision, which could be extended to various types of biological conditions and  
494 imaging modalities.

495 **Funding.** National Institutes of Health (R01CA2131479 and R01CA241618)

496 **Acknowledgments.** The authors thank all the human subjects who consented to having their tissue be part of our  
497 imaging studies, as well as all the staff at the Carle Research Office for assisting in the coordination and consenting of  
498 subjects. We thank Sixian You, Eric J. Chaney for their technical support. We thank all the team members from the  
499 Biophotonics Imaging Laboratory for their suggestions and support. Additional information can be found at:  
500 <http://biophotonics.illinois.edu>.

501 **Disclosures.** SAB: LiveBx LLC (I,C,P), HT: LiveBx LLC (I,C,P).

502 **Data availability.** The SLAM human breast cancer datasets that support the findings of this study are available from  
503 the corresponding author (S.A.B.) upon request and through collaborative investigations.

504 **Supplemental document.** See [Supplement 1](#) for supporting content.

## 505 References

- 506 1. D. Débarre, W. Supatto, A.-M. Pena, A. Fabre, T. Tordjmann, L. Combettes, M.-C. Schanne-Klein, and E.  
507 Beaufrepaire, "Imaging lipid bodies in cells and tissues using third-harmonic generation microscopy," *Nature*  
508 *Methods* **3**, 47-53 (2006).
- 509 2. H. Tu, Y. Liu, D. Turchinovich, M. Marjanovic, J. K. Lyngsø, J. Lægsgaard, E. J. Chaney, Y. Zhao, S. You,  
510 and W. L. Wilson, "Stain-free histopathology by programmable supercontinuum pulses," *Nature Photonics* **10**,  
511 534-540 (2016).
- 512 3. S. You, H. Tu, Y. Zhao, Y. Liu, E. J. Chaney, M. Marjanovic, and S. A. Boppart, "Raman spectroscopic  
513 analysis reveals abnormal fatty acid composition in tumor micro-and macroenvironments in human breast and  
514 rat mammary cancer," *Scientific Reports* **6**, 1-10 (2016).
- 515 4. W. R. Zipfel, R. M. Williams, R. Christie, A. Y. Nikitin, B. T. Hyman, and W. W. Webb, "Live tissue intrinsic  
516 emission microscopy using multiphoton-excited native fluorescence and second harmonic generation,"  
517 *Proceedings of the National Academy of Sciences* **100**, 7075-7080 (2003).
- 518 5. S. A. Boppart, S. You, L. Li, J. Chen, and H. Tu, "Simultaneous label-free autofluorescence-multiharmonic  
519 microscopy and beyond," *APL Photonics* **4**, 100901 (2019).
- 520 6. S. You, H. Tu, E. J. Chaney, Y. Sun, Y. Zhao, A. J. Bower, Y.-Z. Liu, M. Marjanovic, S. Sinha, and Y. Pu,  
521 "Intravital imaging by simultaneous label-free autofluorescence-multiharmonic microscopy," *Nature*  
522 *Communications* **9**, 1-9 (2018).
- 523 7. Z. Liu, L. Jin, J. Chen, Q. Fang, S. Ablameyko, Z. Yin, and Y. Xu, "A survey on applications of deep learning  
524 in microscopy image analysis," *Computers in Biology and Medicine* **134**, 104523 (2021).
- 525 8. S. K. Zhou, H. Greenspan, C. Davatzikos, J. S. Duncan, B. Van Ginneken, A. Madabhushi, J. L. Prince, D.  
526 Rueckert, and R. M. Summers, "A review of deep learning in medical imaging: Imaging traits, technology  
527 trends, case studies with progress highlights, and future promises," *Proc. IEEE* **109**, 820-838 (2021).
- 528 9. A. Echle, N. T. Rindtorff, T. J. Brinker, T. Luedde, A. T. Pearson, and J. N. Kather, "Deep learning in cancer  
529 pathology: a new generation of clinical biomarkers," *British Journal of Cancer* **124**, 686-696 (2021).
- 530 10. V. Cheplygina, M. de Bruijne, and J. P. Pluim, "Not-so-supervised: a survey of semi-supervised, multi-instance,  
531 and transfer learning in medical image analysis," *Medical Image Analysis* **54**, 280-296 (2019).
- 532 11. J. Amores, "Multiple instance classification: Review, taxonomy and comparative study," *Artificial Intelligence*  
533 **201**, 81-105 (2013).
- 534 12. M. Prince, "Does active learning work? A review of the research," *Journal of Engineering Education* **93**, 223-  
535 231 (2004).
- 536 13. J. E. van Engelen, and H. H. Hoos, "A survey on semi-supervised learning," *Machine Learning* **109**, 373-440  
537 (2020).
- 538 14. H. Song, M. Kim, D. Park, Y. Shin, and J.-G. Lee, "Learning from noisy labels with deep neural networks: A  
539 survey," *IEEE Transactions on Neural Networks and Learning Systems* (2022).
- 540 15. J. Yao, X. Zhu, J. Jonnagaddala, N. Hawkins, and J. Huang, "Whole slide images based cancer survival  
541 prediction using attention guided deep multiple instance learning networks," *Medical Image Analysis* **65**,  
542 101789 (2020).
- 543 16. M. Liu, J. Zhang, E. Adeli, and D. Shen, "Landmark-based deep multi-instance learning for brain disease  
544 diagnosis," *Medical Image Analysis* **43**, 157-168 (2018).

- 545  
546  
547  
548  
549  
550  
551  
552  
553  
554  
555  
556  
557  
558  
559  
560  
561  
562  
563  
564  
565  
566  
567  
568  
569  
570  
571  
572  
573  
574  
575  
576  
577  
578  
579  
580  
581  
582  
583  
584  
585  
586  
587  
588  
589  
590  
591  
592  
593  
594  
595  
596  
597  
598  
599  
600  
601  
602  
603  
604  
605  
606  
607  
608
17. P. Sudharshan, C. Petitjean, F. Spanhol, L. E. Oliveira, L. Heutte, and P. Honeine, "Multiple instance learning for histopathological breast cancer image classification," *Expert Systems with Applications* **117**, 103-111 (2019).
  18. M.-A. Carbonneau, V. Cheplygina, E. Granger, and G. Gagnon, "Multiple instance learning: A survey of problem characteristics and applications," *Pattern Recognition* **77**, 329-353 (2018).
  19. G. Campanella, M. G. Hanna, L. Geneslaw, A. Mirafior, V. Werneck Krauss Silva, K. J. Busam, E. Brogi, V. E. Reuter, D. S. Klimstra, and T. J. Fuchs, "Clinical-grade computational pathology using weakly supervised deep learning on whole slide images," *Nature Medicine* **25**, 1301-1309 (2019).
  20. S. You, Y. Sun, E. J. Chaney, Y. Zhao, J. Chen, S. A. Boppart, and H. Tu, "Slide-free virtual histochemistry (Part I): development via nonlinear optics," *Biomedical Optics Express* **9**, 5240-5252 (2018).
  21. D. A. Orringer, B. Pandian, Y. S. Niknafs, T. C. Hollon, J. Boyle, S. Lewis, M. Garrard, S. L. Hervey-Jumper, H. J. Garton, and C. O. Maher, "Rapid intraoperative histology of unprocessed surgical specimens via fibre-laser-based stimulated Raman scattering microscopy," *Nature Biomedical Engineering* **1**, 1-13 (2017).
  22. B. Armeth, "Tumor microenvironment," *Medicina* **56**, 15 (2019).
  23. T. J. Willenbrink, E. S. Ruiz, C. M. Cornejo, C. D. Schmults, S. T. Arron, and A. Jambusaria-Pahlajani, "Field cancerization: definition, epidemiology, risk factors, and outcomes," *Journal of the American Academy of Dermatology* **83**, 709-717 (2020).
  24. F. Mbeunkui, and D. J. Johann, "Cancer and the tumor microenvironment: a review of an essential relationship," *Cancer Chemotherapy and Pharmacology* **63**, 571-582 (2009).
  25. K. Curtius, N. A. Wright, and T. A. Graham, "An evolutionary perspective on field cancerization," *Nature Reviews Cancer* **18**, 19-32 (2018).
  26. J. Foulds, and E. Frank, "A review of multi-instance learning assumptions," *The Knowledge Engineering Review* **25**, 1-25 (2010).
  27. S. Andrews, I. Tsochantaris, and T. Hofmann, "Support vector machines for multiple-instance learning," *Advances in Neural Information Processing Systems* **15** (2002).
  28. K. He, X. Zhang, S. Ren, and J. Sun, "Identity mappings in deep residual networks," in *European Conference on Computer Vision (ECCV)* (2016), pp. 630-645.
  29. M. Ilse, J. Tomczak, and M. Welling, "Attention-based deep multiple instance learning," in *International Conference on Machine Learning (ICML)* (2018), pp. 2127-2136.
  30. L. Hou, D. Samaras, T. M. Kurc, Y. Gao, J. E. Davis, and J. H. Saltz, "Patch-based convolutional neural network for whole slide tissue image classification," in *Conference on Computer Vision and Pattern Recognition (CVPR)* (2016), pp. 2424-2433.
  31. L. Van der Maaten, and G. Hinton, "Visualizing data using t-SNE," *Journal of Machine Learning Research* **9** (2008).
  32. M. Sundararajan, A. Taly, and Q. Yan, "Axiomatic attribution for deep networks," in *International Conference on Machine Learning (ICML)* (2017), pp. 3319-3328.
  33. D. Smilkov, N. Thorat, B. Kim, F. Viégas, and M. Wattenberg, "Smoothgrad: removing noise by adding noise," arXiv:1706.03825 (2017).
  34. S. You, Y. Sun, E. J. Chaney, Y. Zhao, J. Chen, S. A. Boppart, and H. Tu, "Slide-free virtual histochemistry (Part II): detection of field cancerization," *Biomedical Optics Express* **9**, 5253-5268 (2018).
  35. W. Wang, J. B. Wyckoff, V. C. Frohlich, Y. Oleynikov, S. Huttelmaier, J. Zavadil, L. Cermak, E. P. Bottinger, R. H. Singer, and J. G. White, "Single cell behavior in metastatic primary mammary tumors correlated with gene expression patterns revealed by molecular profiling," *Cancer Research* **62**, 6278-6288 (2002).
  36. P. P. Provenzano, K. W. Eliceiri, J. M. Campbell, D. R. Inman, J. G. White, and P. J. Keely, "Collagen reorganization at the tumor-stromal interface facilitates local invasion," *BMC Medicine* **4**, 1-15 (2006).
  37. G. Xi, W. Guo, D. Kang, J. Ma, F. Fu, L. Qiu, L. Zheng, J. He, N. Fang, and J. Chen, "Large-scale tumor-associated collagen signatures identify high-risk breast cancer patients," *Theranostics* **11**, 3229 (2021).
  38. H. Tu, Y. Liu, M. Marjanovic, E. J. Chaney, S. You, Y. Zhao, and S. A. Boppart, "Concurrence of extracellular vesicle enrichment and metabolic switch visualized label-free in the tumor microenvironment," *Science Advances* **3**, e1600675 (2017).
  39. S. You, R. Barkalifa, E. J. Chaney, H. Tu, J. Park, J. E. Sorrells, Y. Sun, Y.-Z. Liu, L. Yang, and D. Z. Chen, "Label-free visualization and characterization of extracellular vesicles in breast cancer," *Proceedings of the National Academy of Sciences* **116**, 24012-24018 (2019).
  40. V. Muralidharan-Chari, J. W. Clancy, A. Sedgwick, and C. D'Souza-Schorey, "Microvesicles: mediators of extracellular communication during cancer progression," *Journal of Cell Science* **123**, 1603-1611 (2010).
  41. A. Becker, B. K. Thakur, J. M. Weiss, H. S. Kim, H. Peinado, and D. Lyden, "Extracellular vesicles in cancer: cell-to-cell mediators of metastasis," *Cancer Cell* **30**, 836-848 (2016).
  42. E. Panieri, and M. Santoro, "ROS homeostasis and metabolism: a dangerous liason in cancer cells," *Cell Death & Disease* **7**, e2253-e2253 (2016).
  43. M. G. Vander Heiden, L. C. Cantley, and C. B. Thompson, "Understanding the Warburg effect: the metabolic requirements of cell proliferation," *Science* **324**, 1029-1033 (2009).
  44. B. Costa-Silva, N. M. Aiello, A. J. Ocean, S. Singh, H. Zhang, B. K. Thakur, A. Becker, A. Hoshino, M. T. Mark, and H. Molina, "Pancreatic cancer exosomes initiate pre-metastatic niche formation in the liver," *Nature Cell Biology* **17**, 816-826 (2015).

- 609  
610  
611  
612  
613  
614  
615
45. E. Willms, C. Cabañas, I. Mäger, M. J. Wood, and P. Vader, "Extracellular vesicle heterogeneity: subpopulations, isolation techniques, and diverse functions in cancer progression," *Frontiers in Immunology* **9**, 738 (2018).
  46. Y. Sun, S. You, H. Tu, D. R. Spillman Jr, E. J. Chaney, M. Marjanovic, J. Li, R. Barkalifa, J. Wang, and A. M. Higham, "Intraoperative visualization of the tumor microenvironment and quantification of extracellular vesicles by label-free nonlinear imaging," *Science Advances* **4**, eaau5603 (2018).
